# Supplementary material for: Directed assembly of fullerenols via electrostatic and coordination interactions to fabricate diverse and water-soluble metal cation–fullerene nanocluster complexes
Source: Royal Society of Chemistry journal article supplement (doi:10.1039/d3ra07725j), 2024-01-01
Supplement: d3ra07725j1.pdf [file d3ra07725j1.pdf]

## Supplementary Information

# Directed-assembly of Fullerenols via Electrostatic and Coordination Dual-actuation Interactions to Fabricate Diverse and Water-soluble Metal Cation-fullerene Nanocluster Complexes

Rui He<sup>1#</sup>, Chenjie Fan<sup>1#</sup>, Qingyuan Liang<sup>1</sup>, Yan Wang<sup>1</sup>, Yanyan Gao<sup>1</sup>, Jiakai Wu<sup>1</sup>,  
Qingnan Wu<sup>1\*</sup> and Fujun Tai<sup>2\*</sup>

<sup>1</sup>NanoAgro Center, College of Plant Protection, Henan Agricultural University,  
Zhengzhou 450046, China

<sup>2</sup>National Key Laboratory of Wheat and Maize Crop Science, College of Life Science,  
Henan Agricultural University, Zhengzhou 450046, China

\*Corresponding authors (email: wuqingnan@henau.edu.cn (Wu Q);  
taifujun@henau.edu.cn (Tai F))

# R. H. and C. F. contributed equally to this work.

**This Supplementary Information includes:**

**Supplementary Figures 1 to 9**

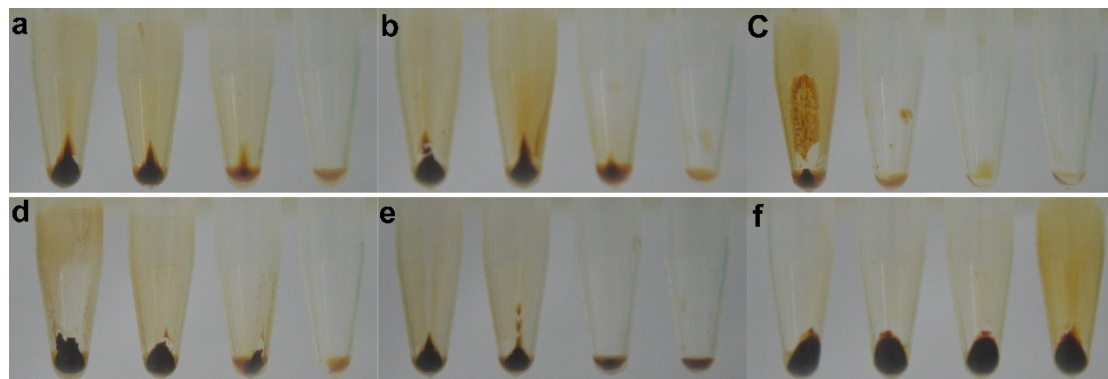

Figure S1 The photographs of precipitates in the plastic centrifuge tubes after centrifuging aqueous solution of **Fol** (4.0 mM, 0.5 ml) upon the addition of equivalent volume of (a) KCl, (b) NaCl, (c) LiCl, (d) CH<sub>3</sub>COONa, (e) NaOH, or (f) HCl (from left to right  $c_{\text{Fol}}:c_{\text{M}^+} = 1:1000, 1:500, 1:250, \text{ and } 1:100$ ).  $c$  is the molarity of alkali metal ion, hydrogen ion, or **Fol**.

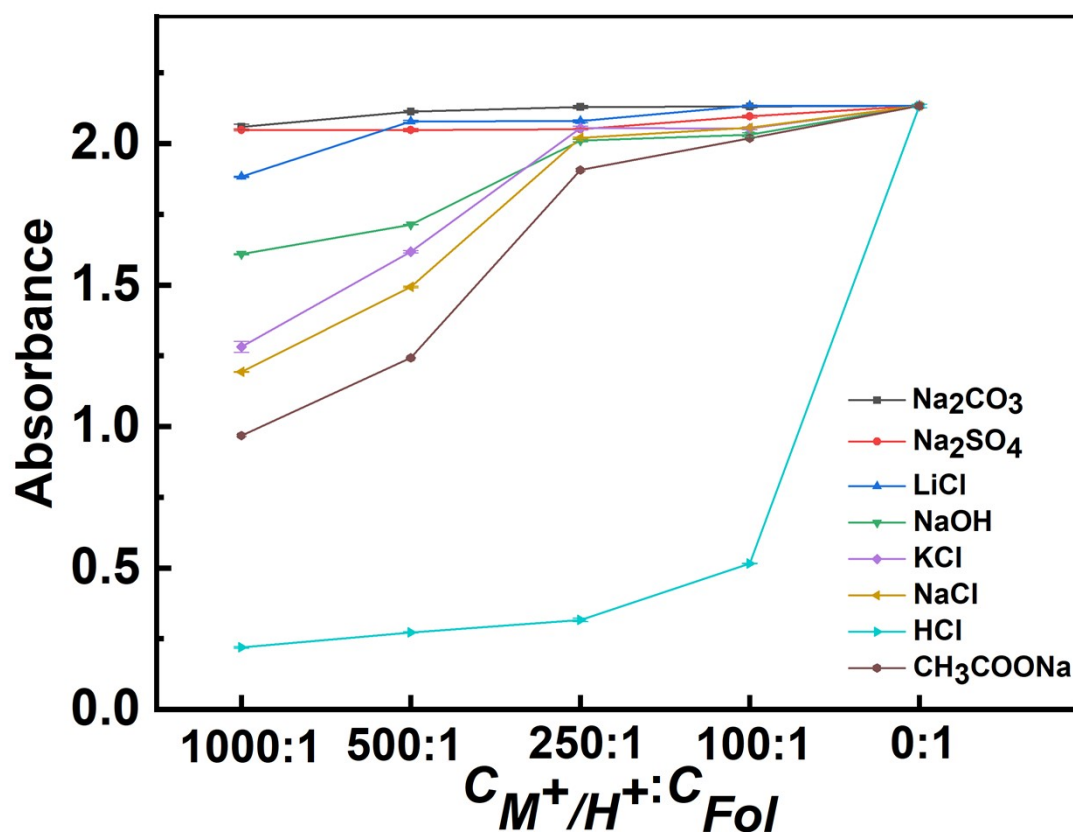

Figure S2 UV absorbances of 40-fold dilution of supernatants after centrifuging aqueous solution of **Fol** (4.0 mM, 0.5 ml) upon the addition of equivalent volume of KCl, NaCl, LiCl, HCl,  $Na_2SO_4$ ,  $Na_2CO_3$ ,  $CH_3COONa$ , or NaOH ( $c_{Fol}:c_{M^+}/H^+= 1:1000, 1:500, 1:250, 1:100, \text{ and } 1:0$ ).  $c$  is the molarity of alkali metal ion, hydrogen ion, or **Fol**. The higher the absorption value was, the higher the concentration of **Fol** in supernatant was, correspondingly, the less precipitation was.

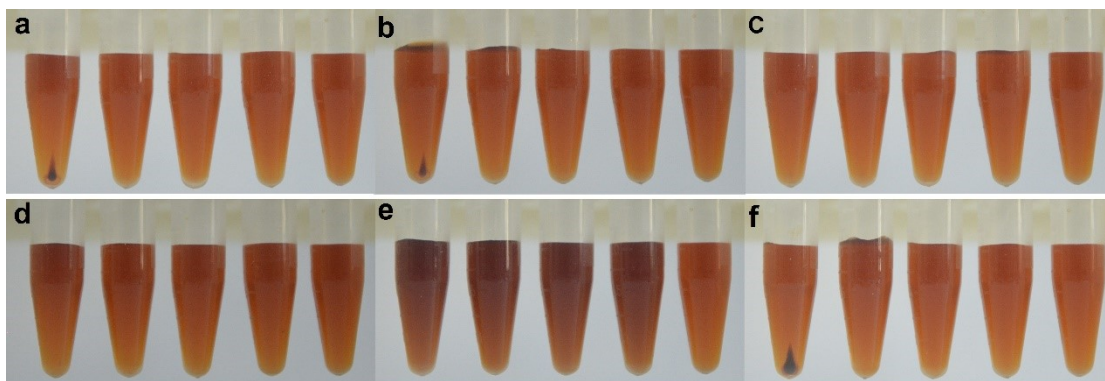

Figure S3 The photographs of aqueous solution of **Fol** (1.6 mM, 0.5 ml) upon the addition of equivalent volume of (a) KCl, (b) NaCl, (c) LiCl, (d) Na<sub>2</sub>SO<sub>4</sub>, (e) Na<sub>2</sub>CO<sub>3</sub>, or (f) CH<sub>3</sub>COONa in the plastic centrifuge tubes (from left to right  $c_{\text{Fol}}:c_{M^+} = 1:1000$ , 1:500, 1:250, 1:100, and 1:0) after centrifugation.  $c$  is the molarity of alkali metal ion and **Fol**.

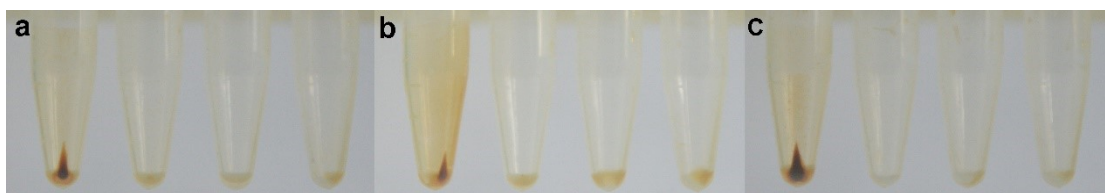

Figure S4 The photographs of precipitates in the plastic centrifuge tubes after centrifuging aqueous solution of **Fol** (1.6 mM, 0.5 ml) upon the addition of equivalent volume of (a) KCl, (b) NaCl, or (c) CH<sub>3</sub>COONa (from left to right  $c_{\text{Fol}}:c_{M^+} = 1:1000$ , 1:500, 1:250, and 1:100).  $c$  is the molarity of alkali metal ion or **Fol**.

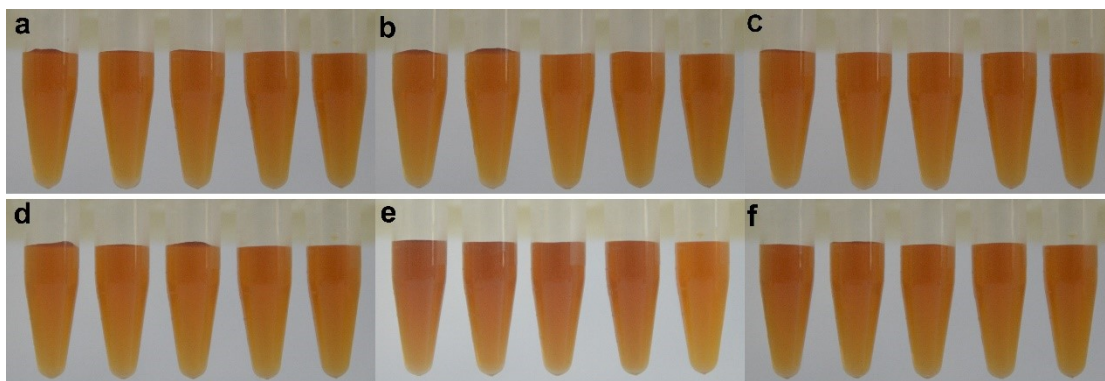

Figure S5 The photograph of aqueous solution of **Fol** (0.8 mM, 0.5 ml) upon the addition of equivalent volume of (a) KCl, (b) NaCl, (c) LiCl, (d) Na<sub>2</sub>SO<sub>4</sub>, (e) Na<sub>2</sub>CO<sub>3</sub>, or (f) CH<sub>3</sub>COONa in the plastic centrifuge tubes (from left to right  $c_{\text{Fol}}:c_{M^+} = 1:1000$ , 1:500, 1:250, 1:100, and 1:0) after centrifuging.  $c$  is the molarity of alkali metal ion or **Fol**.

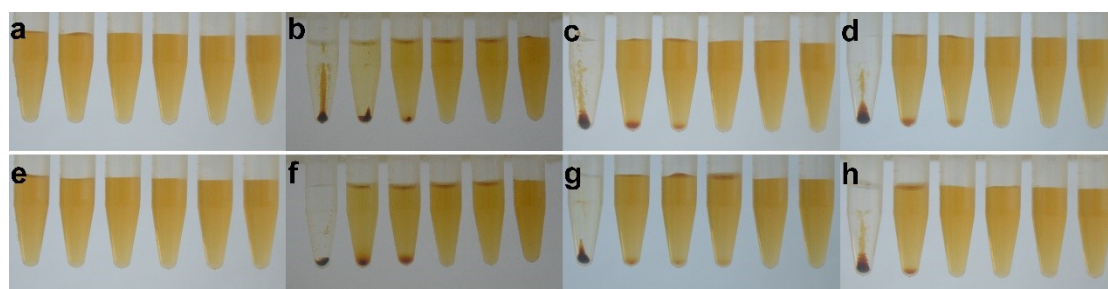

**Figure S6** The photographs of aqueous solution of **Fol** (0.4 mM, 0.5 ml) upon the addition of equivalent volume of (a) NaCl (from left to right 1:1000, 1:100, 1:10, 1:5, 1:1, and 1:0), (b) MgCl<sub>2</sub> (1:100, 1:7.2, 1:7.1, 1:7.0, 1:1, and 1:0), (c) AlCl<sub>3</sub> (1:10, 1:1.6, 1:1, 1:0.8, 1:0.5, and 1:0), (d) LaCl<sub>3</sub> (1:10, 1:1.3, 1:1.2, 1:1.1, 1:1, and 1:0), (e) KCl (1:1000, 1:100, 1:10, 1:5, 1:1, and 1:0), (f) CaCl<sub>2</sub> (1:20, 1:4, 1:3, 1:2, 1:1, and 1:0), (g) SrCl<sub>2</sub> (1:10, 1:3.4, 1:3.2, 1:3.1, 1:1, and 1:0), and (h) HgCl<sub>2</sub> (1:1000, 1:100, 1:10, 1:5, 1:1, and 1:0) in the plastic centrifuge tubes after centrifuging. The proportion is the molar ratio of **Fol** to metal chlorides.

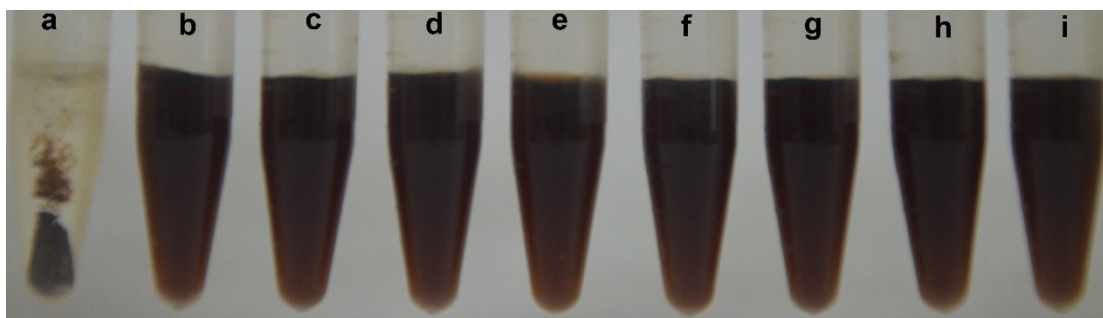

**Figure S7** The photographs of aqueous solution of **IFQA** (4.0 mM, 0.5 ml) upon the addition of 1000-fold equivalent volume of  $\text{HgCl}_2$  (a),  $\text{NaCl}$  (b),  $\text{MgCl}_2$  (c),  $\text{AlCl}_3$  (d),  $\text{LaCl}_3$  (e),  $\text{KCl}$  (f),  $\text{CaCl}_2$  (g),  $\text{SrCl}_2$  (h), and  $\text{H}_2\text{O}$  (i) in the plastic centrifuge tubes after centrifuging.



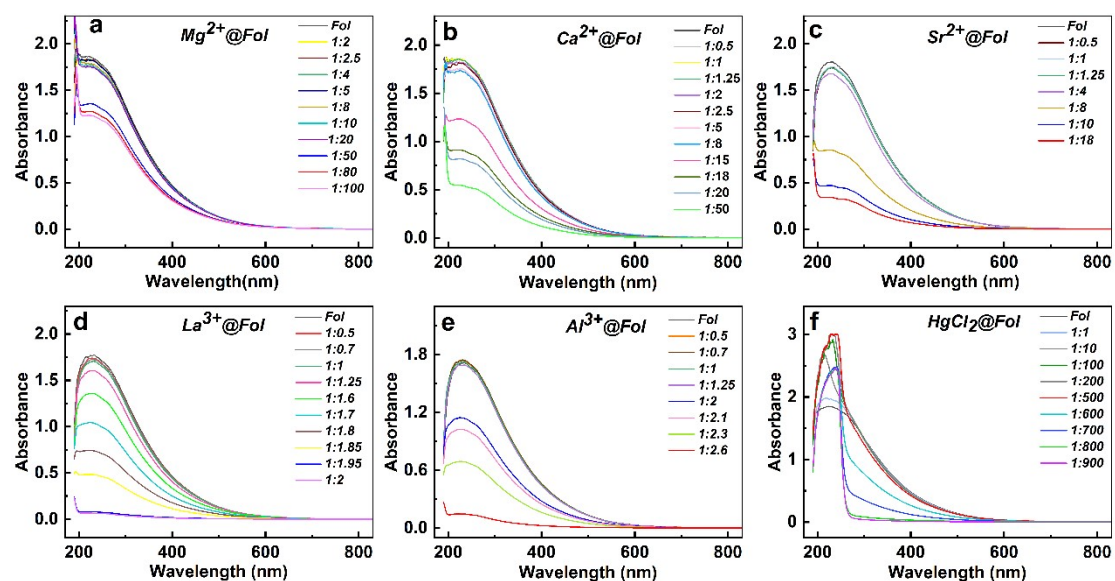

**Figure S8.** UV-visible spectra of 5-fold diluted supernatant for ternary **Fol**-metal chloride-water systems accompanied by the *Fol:metal chloride* ratio between 1:0.5 to 1:900. The fixed concentration of **Fol** is 0.2 mM. a:  $\text{MgCl}_2$ , b:  $\text{CaCl}_2$ , c:  $\text{SrCl}_2$ , d:  $\text{LaCl}_3$ , e:  $\text{AlCl}_3$ , and f:  $\text{HgCl}_2$ .
